# Supplementary material for: Weighted gene co-expression network analysis of the peripheral blood from Amyotrophic Lateral Sclerosis patients
Source: PubMed Central journal article supplement (PMC2743717; doi:10.1186/1471-2164-10-405), 2009-08-27

ALS R1 Network

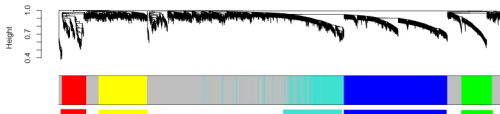

ALS R2 Network

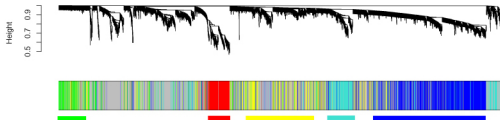

ALS R3 Network

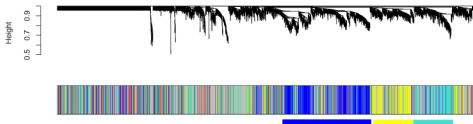

Supplement: 1471-2164-10-405-S2.pdf [file 1471-2164-10-405-S2.pdf]
